# Supplementary material for: Fecal Malodor Detection Using Low-Cost Electrochemical Sensors
Source: MDPI journal article supplement (doi:10.3390/s20102888), 2020-05-20

# Fecal Malodor Detection Using Low-Cost Electrochemical Sensors

Siddharth Kawadiya <sup>1</sup>, Claire Welling <sup>2</sup>, Sonia Grego <sup>2</sup> and Marc A. Deshusses <sup>1,3,\*</sup>

<sup>1</sup> Department of Civil and Environmental Engineering, Box 90287, Duke University, Durham, NC 27708, USA; siddharth.kawadiya@duke.edu

<sup>2</sup> Duke University Center for WaSH-AID and Department of Electrical and Computer Engineering, Durham, NC 27701, USA. claire.welling@duke.edu (C.W.); sonia.grego@duke.edu (S.G.)

<sup>3</sup> Duke Global Health Institute, Box 90287, Duke University, Durham, NC 27708, USA

\* Correspondence: marc.deshusses@duke.edu; Tel.: +1-919-660-5480

Received: 24 April 2020; Accepted: 17 May 2020; Published: 20 May 2020

## Supplementary Materials

Table S1 reports the response time T63 and T90 of the 7 sensors that responded to malodor as in Figure 5. Note the sensor enclosure had a total volume of 3.8 L volume (without gas sensors and boards) and malodor air flow was set to 3.5 L/min (see Methods for details), thus resulting in a T63 and T90 of 1.1 and 2.5 min, respectively for the enclosure alone, if assuming the enclosure is behaving as ideally mixed.

**Table S1.** The response time of the system to reach 63% of the steady state value (T63) and 90% (T90) reported as average of at least three measurement.

| Brand     | Sensor             | Gas               | T63 (min) | T90 (min) |
|-----------|--------------------|-------------------|-----------|-----------|
| Membrapor | NH3/CR-200         | NH <sub>3</sub>   | 1.3       | 3.5       |
| Membrapor | H2S/C-10           | H <sub>2</sub> S  | 1.6       | 2.7       |
| SGX       | SGX-7H2S           | H <sub>2</sub> S  | 1.8       | 3.0       |
| SGX       | SGX-4NH3           | NH <sub>3</sub>   | 2.2       | 4.2       |
| Membrapor | CH2O/C-10          | CH <sub>2</sub> O | 2.5       | 4.5       |
| SGX       | EC4-20-SO2         | SO <sub>2</sub>   | 2.5       | 3.2       |
| CityCell  | Sensoric THT 3E 50 | THT               | 3.3       | 5.4       |
| Membrapor | NH3/CR-200         | NH <sub>3</sub>   | 1.3       | 3.5       |
| Membrapor | H2S/C-10           | H <sub>2</sub> S  | 1.6       | 2.7       |
| SGX       | SGX-7H2S           | H <sub>2</sub> S  | 1.8       | 3.0       |

**Table S2.** Correlation coefficient squared ( $R^2$ ) values for the dose response of sensors to the three fecal odorants. Values shown are for amplitude vs odorant concentration plots.

| Sample  | M-NH <sub>3</sub> | M-CH <sub>2</sub> O | M-H <sub>2</sub> S | S-NH <sub>3</sub> | S-H <sub>2</sub> S | S-SO <sub>2</sub> | C-THT | C-Mer | M-ETO  | M-Alc |
|---------|-------------------|---------------------|--------------------|-------------------|--------------------|-------------------|-------|-------|--------|-------|
| Dog     | 0.872             | 0.983               | 0.864              | 0.904             | 0.557              | 0.028             | 0.911 | 0.299 | 0.001  | 0.701 |
| Thermal | 0.986             | 0.993               | 0.984              | 0.960             | 0.976              | 0.071             | 0.938 | 0.984 | 0.210  | 0.001 |
| Human   | 0.865             | 0.984               | 0.996              | 0.913             | 0.888              | 0.459             | 0.923 | 0.901 | 0.0378 | 0.583 |

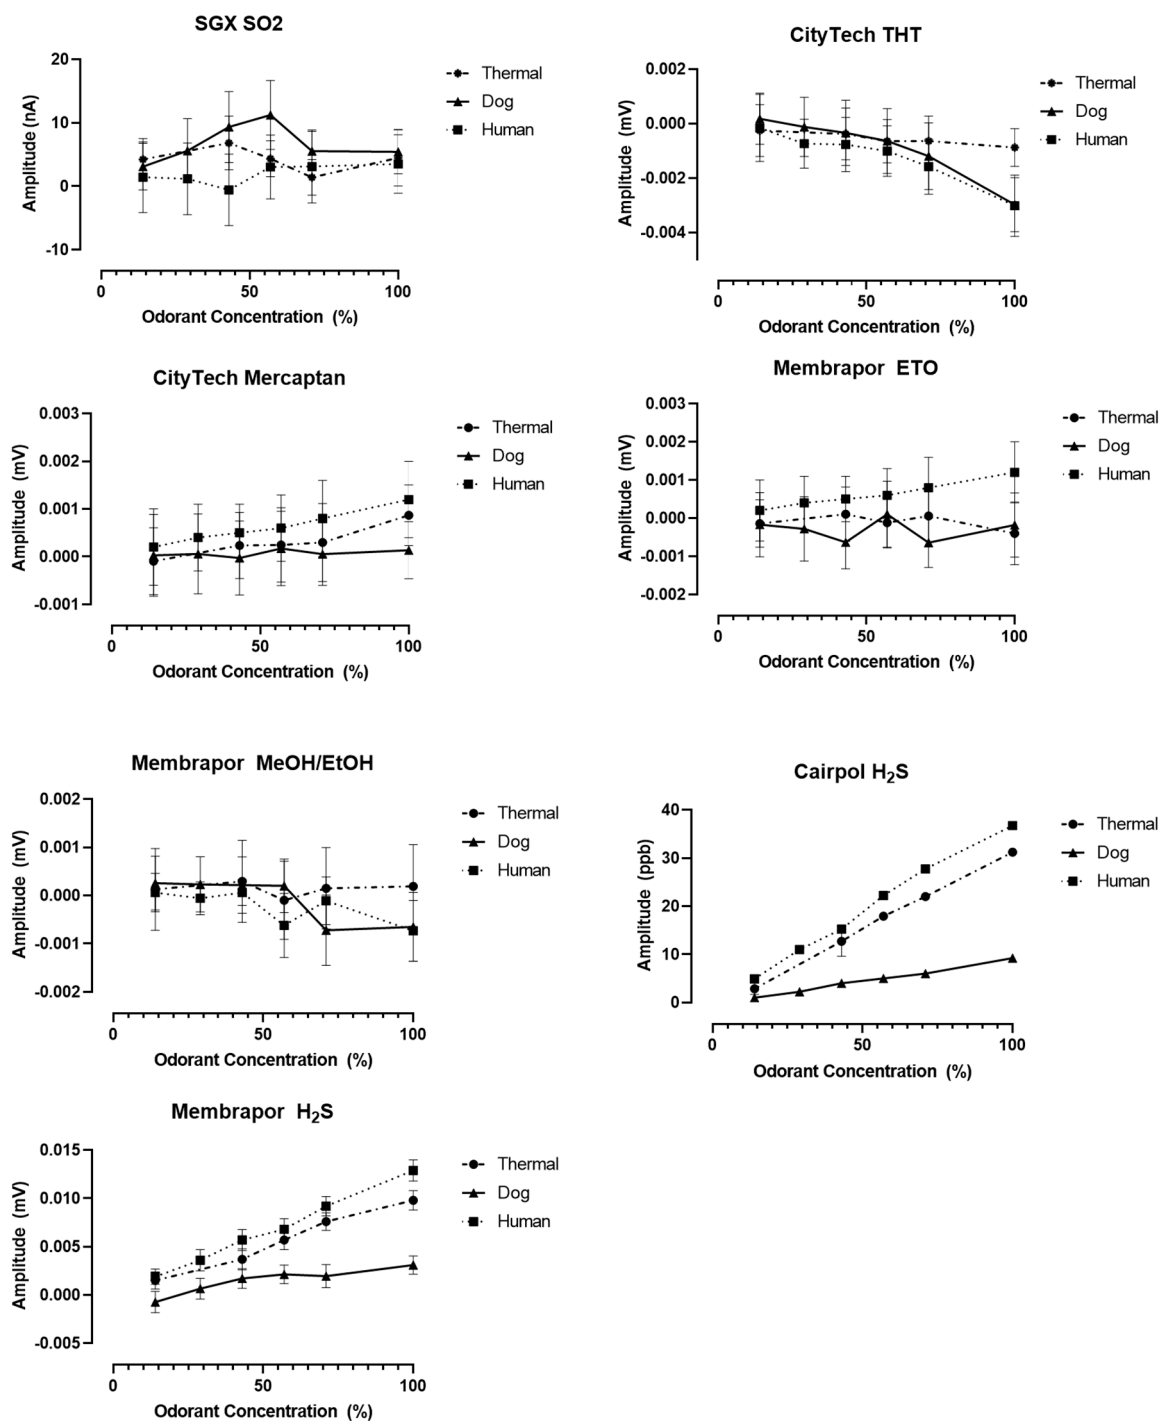

**Figure S1.** Dose response to three fecal malodor specimens by the sensors not shown in Figure 5 in the main manuscript. The dose (%) represents the concentration with respect to the original odor sample. Error bars represent the standard deviation. See text accompanying Figure 5 for details.

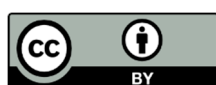

Supplement: s1 [file s1]
